# Supplementary material for: A novel dihydro phenylquinazolinone-based two-in-one colourimetric chemosensor for nickel(ii), copper(ii) and its copper complex for the fluorescent colourimetric nanomolar detection of the cyanide anion
Source: Royal Society of Chemistry journal article supplement (doi:10.1039/d0ra09023a), 2020-01-01
Supplement: d0ra09023a1.pdf [file d0ra09023a1.pdf]

## Supplementary Information

### Dihydro phenylquinazolinone based novel two-in-one colorimetric chemosensor for Nickel(II) and Copper(II) and its copper complex for fluorescent colorimetric nanomolar detection of cyanide anion

Memam Sahu,<sup>a</sup> Amit Kumar Manna,<sup>a</sup> Shubhamoy Chowdhury<sup>b</sup> and Goutam Kumar Patra<sup>a\*</sup>

<sup>a</sup>Department of Chemistry, Guru Ghasidas Vishwavidyalaya, Bilaspur (C.G), India

<sup>b</sup>Department of Chemistry, Gour Banga University, Malda, West Bengal 732 103, India

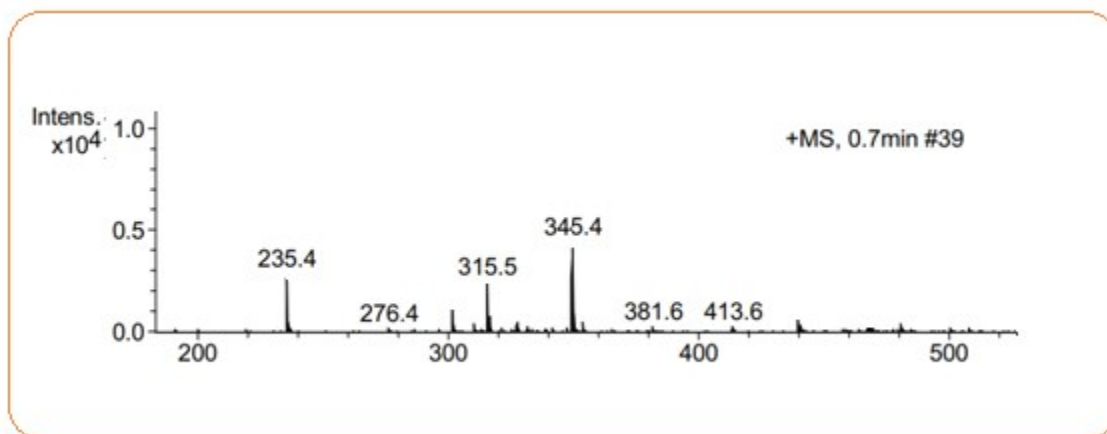

Fig. S1. Mass spectra of L

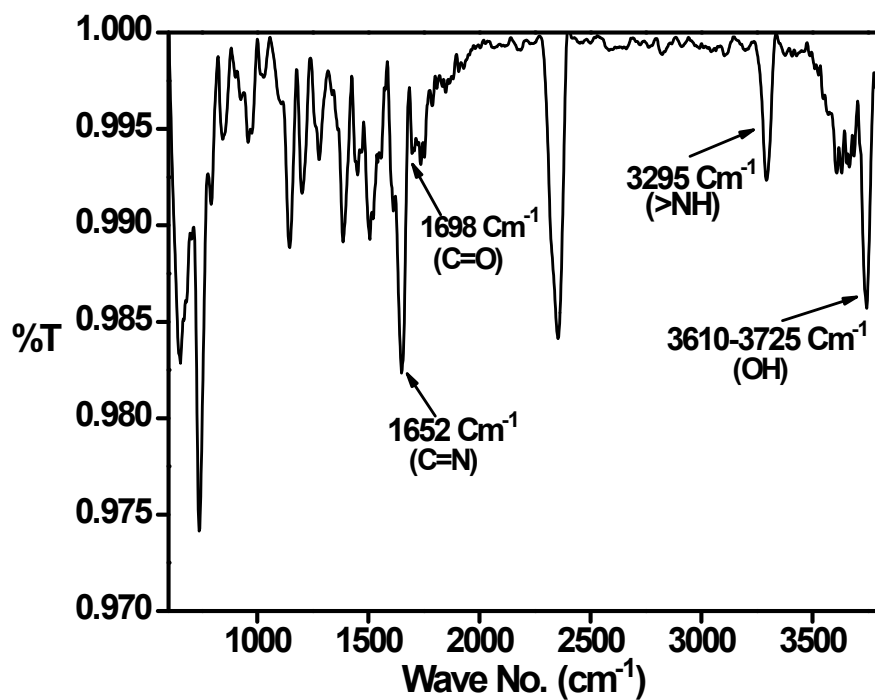

Fig. S2. IR spectra of L.

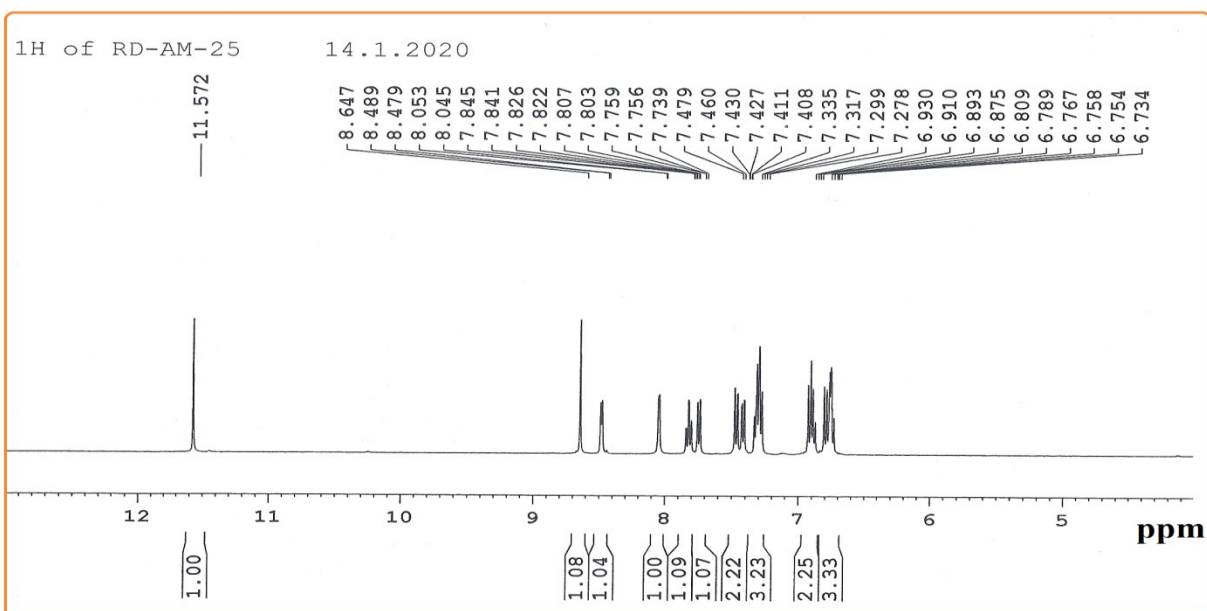

Fig. S3. Partial  $^1\text{H-NMR}$  spectra of L in  $\text{DMSO-d}_6$ .

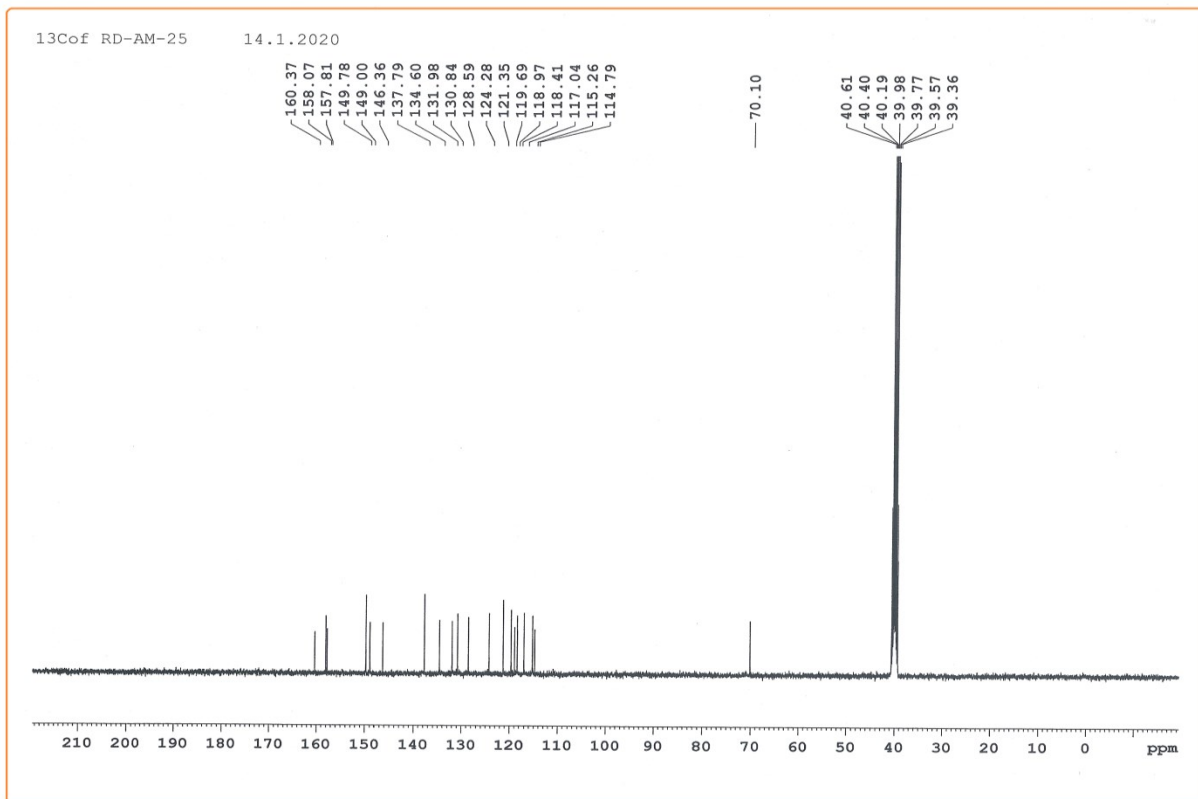

Fig. S4.  $^{13}\text{C}$ -NMR spectra of L in  $\text{DMSO-d}_6$ .

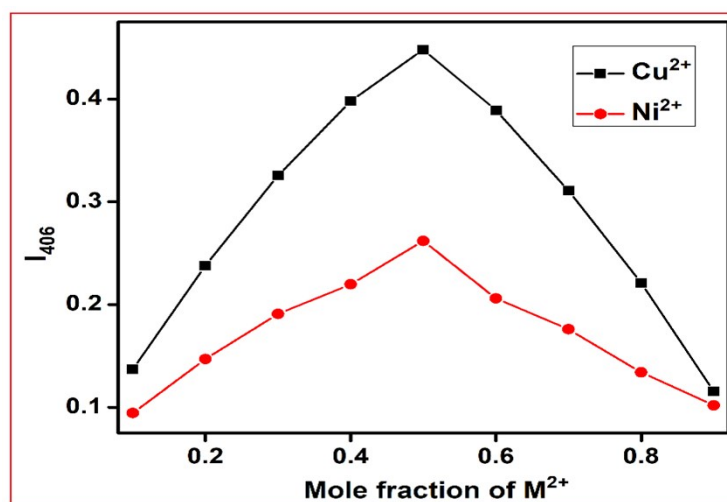

Fig. S5: Jobs Plot.

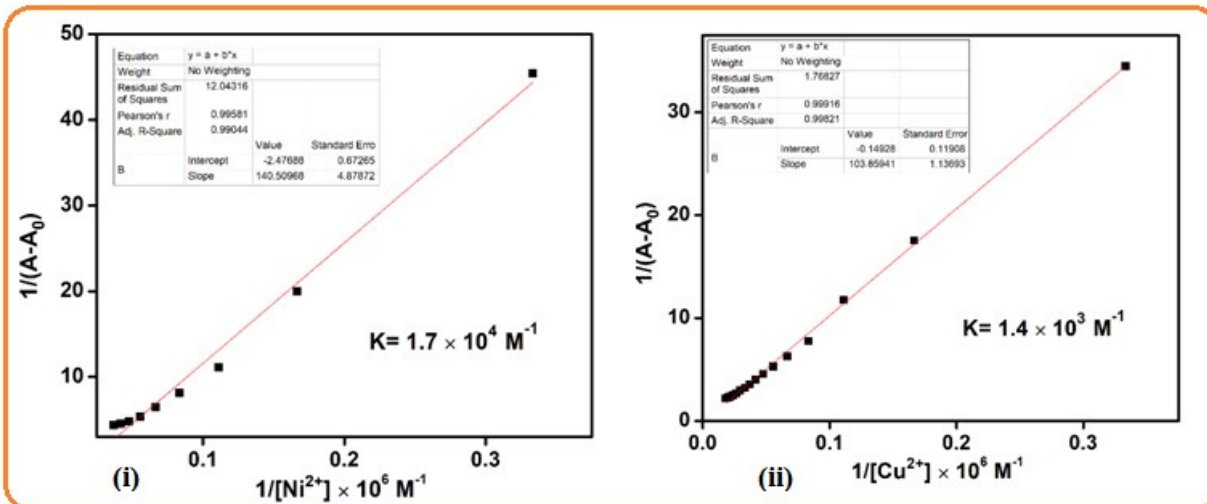

**Fig. S6.** Association constants of L towards (i)  $\text{Ni}^{2+}$  and (ii)  $\text{Cu}^{2+}$  ions.

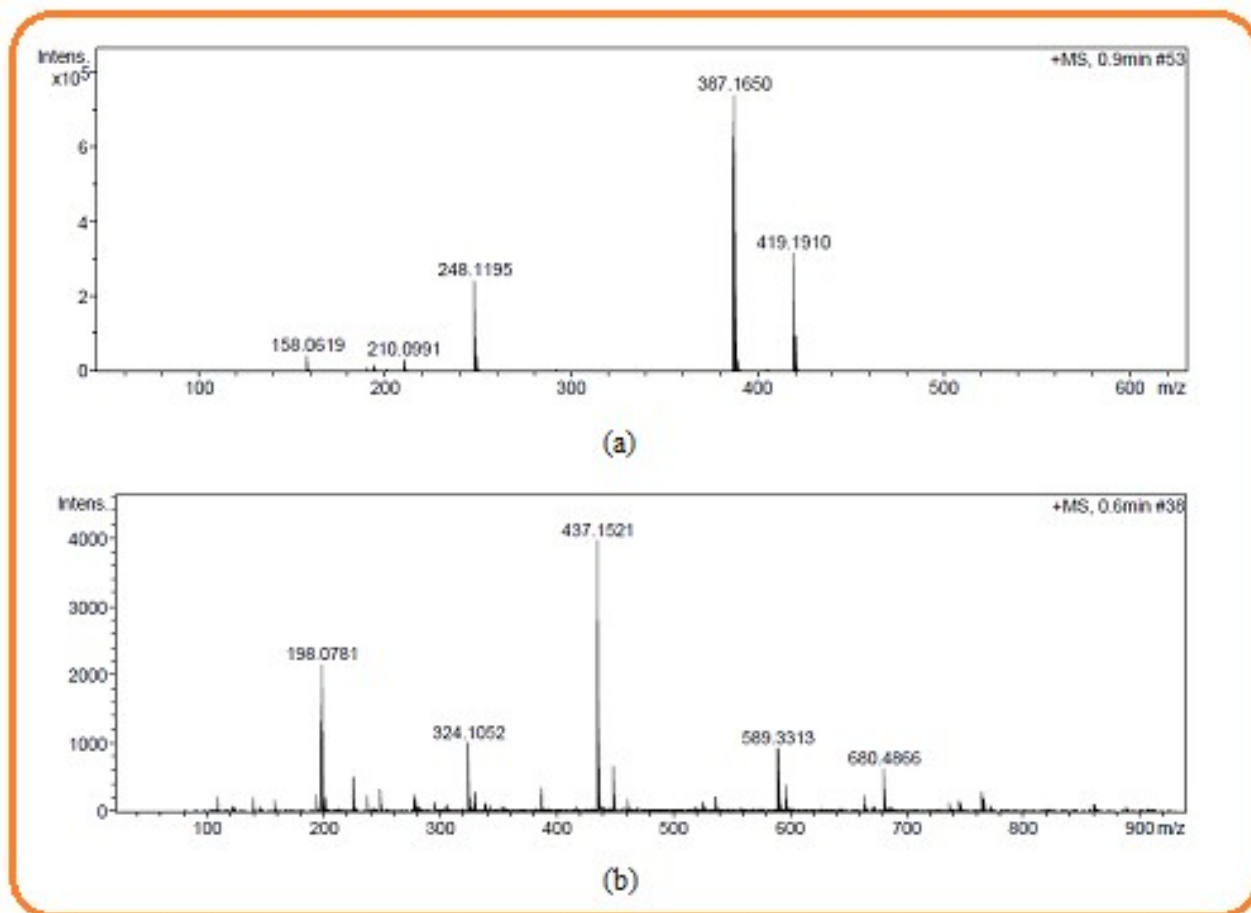

**Fig. S7.** ESI-Mass spectra of (a)  $\text{L-Ni}^{2+}$  and (b)  $\text{L-Cu}^{2+}$  complexes.

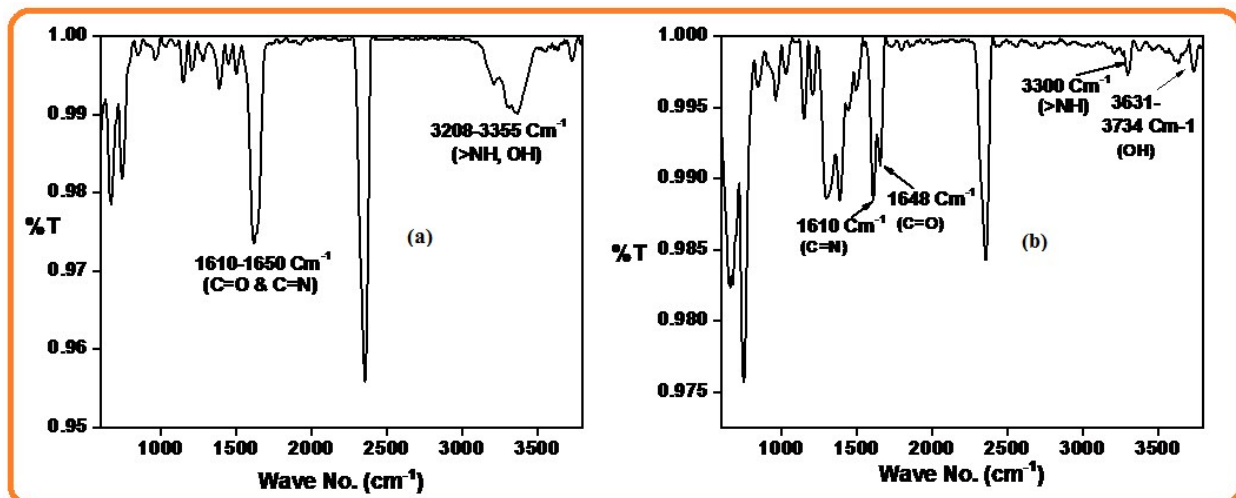

Fig. S8. FTIR spectra of [NiL(OH)] (1) and [CuL(OCH<sub>3</sub>)](2).

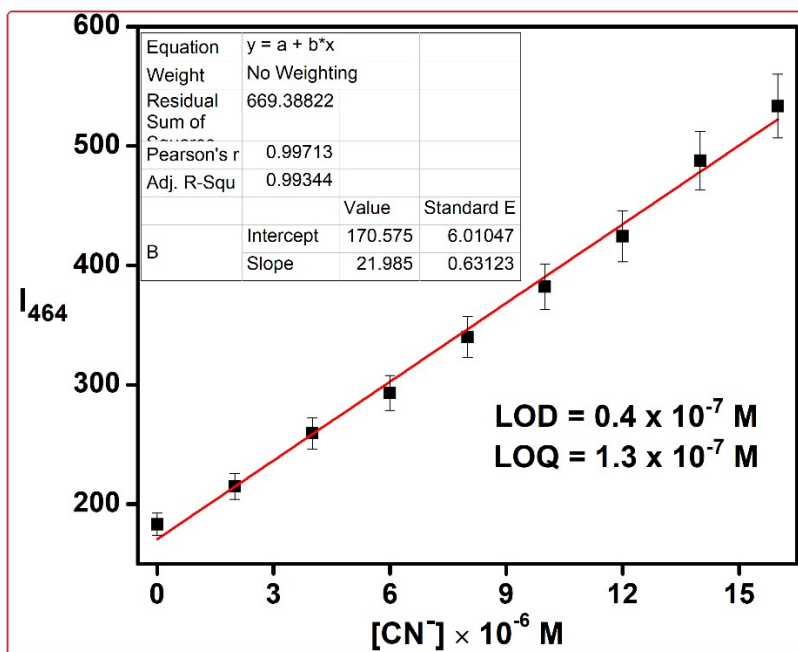

Fig. S9. Fluorometric detection limit of L+Cu<sup>2+</sup> towards CN<sup>-</sup> ion.

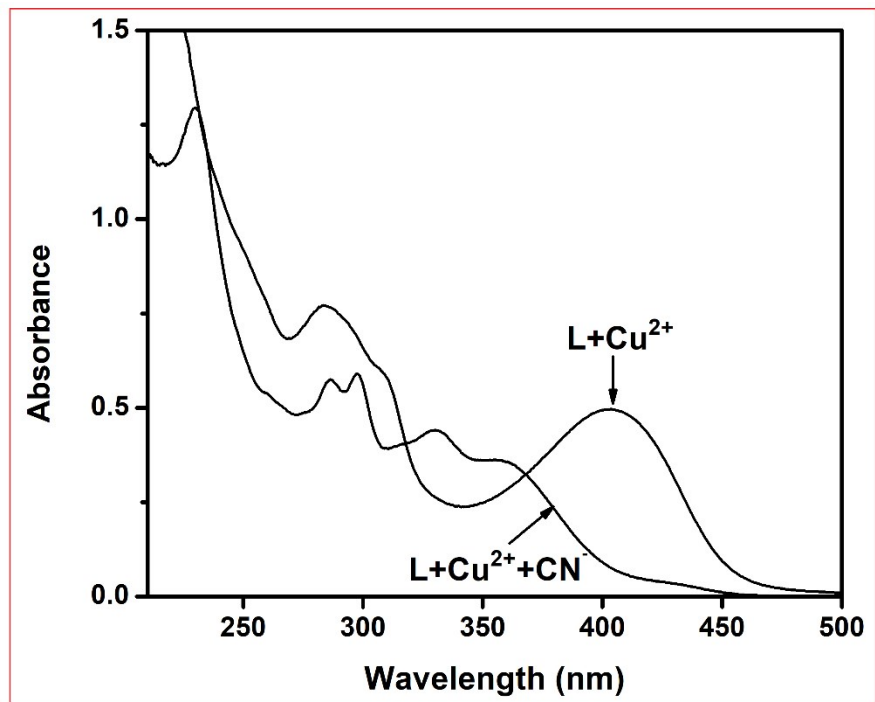

**Fig. S10.** UV-Vis absorption response of probe  $L+Cu^{2+}$  ( $10\ \mu M$ ) in methanol-*tris*-HCl buffer (1:1 v/v) upon addition of  $CN^-$  anions (5 equiv.).

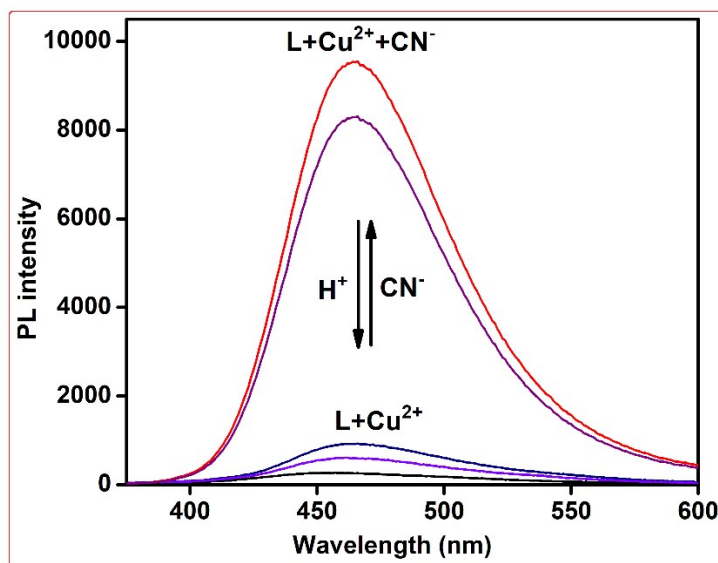

**Fig. S11.** Reversibility of  $L+Cu^{2+}$  towards  $CN^-$ .

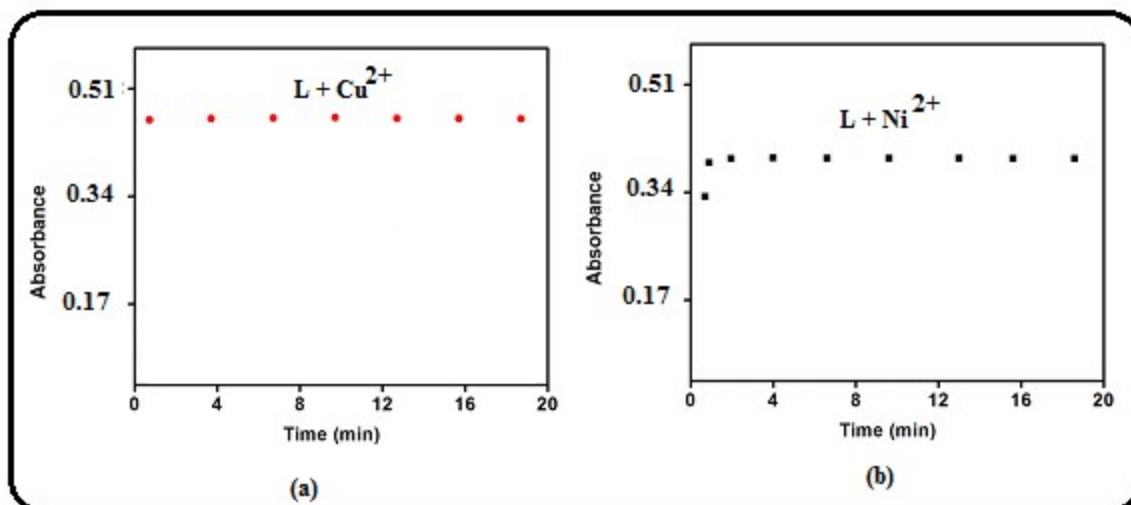

Fig. S12. Time responses of L towards Cu<sup>2+</sup> and Ni<sup>2+</sup>.

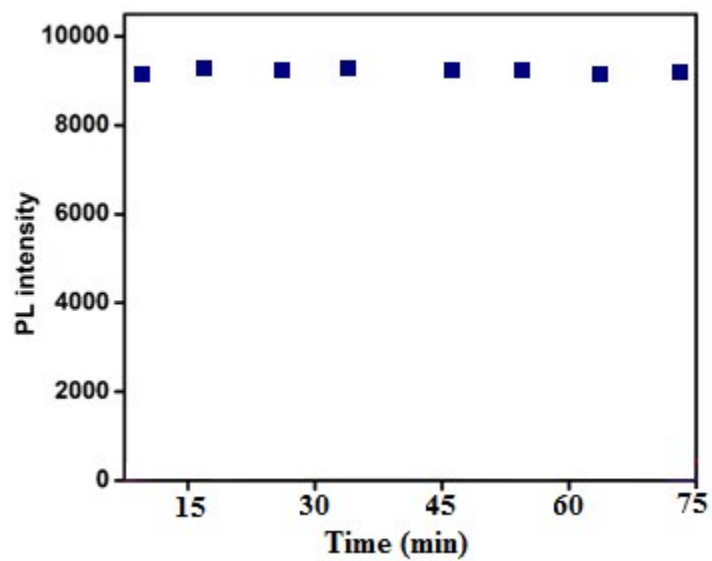

Fig. S13. Time responses of L + Cu<sup>2+</sup> towards CN<sup>-</sup>.

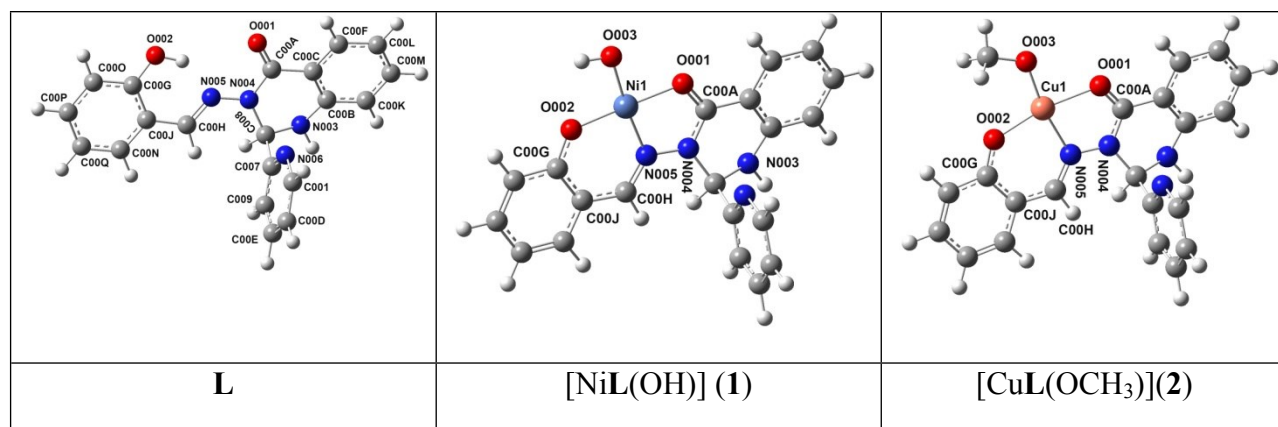

**Fig. S14.** Geometry optimized structure of **L**, **[NiL(OH)](1)** and **[CuL(OCH<sub>3</sub>)] (2)**.

**Table S1** Recent chemosensor / materials for detection of CN<sup>-</sup>.

| Chemosensor/Material            | Method used          | LOD                  | Reference     |
|---------------------------------|----------------------|----------------------|---------------|
| Bimetal organic Framework       | Fluorescent turn on  | 1.9x10 <sup>-8</sup> | 1             |
| Zn-coordination Polymer         | Fluorescent turn off | 9.0x10 <sup>-6</sup> | 2             |
| Gold nanocluster                | Fluorescent turn off | 2.0x10 <sup>-7</sup> | 3             |
| Phenothiazine derivative        | Fluorescent turn off | 3.2x10 <sup>-9</sup> | 4             |
| Naphthoquinone-indole ensembles | Fluorescent turn on  | 2.1x10 <sup>-9</sup> | 5             |
| Dihydro phenylquinazolinone     | Fluorescent turn on  | 4.0x10 <sup>-8</sup> | Present study |

**Table S2** Selected bond parameters for geometry optimized structures of **[NiL(OH)] (1)** and **[CuL(OCH<sub>3</sub>)] (2)**.

| Bond Parameter         | Optimized <b>[NiL(OH)] (1)</b> | Bond Parameter | Optimized <b>[CuL(OCH<sub>3</sub>)] (2)</b> |
|------------------------|--------------------------------|----------------|---------------------------------------------|
| <b>Bond length (Å)</b> |                                |                |                                             |
| Ni1-O001               | 1.85077                        | Cu1-O001       | 1.94818                                     |
| Ni1-O002               | 1.91286                        | Cu1-O002       | 2.09329                                     |
| Ni1-O003               | 1.83519                        | Cu1-O003       | 1.85210                                     |
| Ni1-N005               | 1.89700                        | Cu1-N005       | 2.06074                                     |
| C00A-O001              | 1.31071                        | C00A-O001      | 1.29399                                     |
| O002-C00G              | 1.26594                        | O002-C00G      | 1.24454                                     |
| N005-C00H              | 1.47200                        | N005-C00H      | 1.46496                                     |
| N004-N005              | 1.39162                        | N004-N005      | 1.38971                                     |
| <b>Bond angle (°)</b>  |                                |                |                                             |
| O001-Ni1-O003          | 90.02333                       | O001-Cu1-O003  | 99.24156                                    |
| O001- Ni1-N005         | 95.50909                       | O001-Cu1-N005  | 91.02902                                    |
| O002- Ni1-N005         | 83.09986                       | O002-Cu1-N005  | 76.91589                                    |
| O002- Ni1-O003         | 91.36677                       | O002-Cu1-O003  | 92.83055                                    |



|                |           |               |           |
|----------------|-----------|---------------|-----------|
| O001- Ni1-O002 | 178.58167 | O001-Cu1-O002 | 167.88140 |
| O003- Ni1-N005 | 174.46376 | O003-Cu1-N005 | 169.70270 |

## References

1. A. Karmakar, B. Joarder, A. Mallick, P. Samanta, A. V. Desai, S. Basu and S. K. Ghosh, Aqueous phase sensing of cyanide ions using a hydrolytically stable metalorganic framework, *Chem. Commun.*, 2017, **53**, 1253–1256.
2. L. D. Rosales-Vázquez, J. Valdes-García, I.J. Bazany-Rodríguez, J. M. Germán-Acacio, D. Martínez-Otero, A. R. Vilchis-Néstor, R. Morales-Luckie, V. Sánchez-Mendieta and A. Dorazco-González, A sensitive photoluminescent chemosensor for cyanide in water based on a zinc coordination polymer bearing ditert-butyl-bipyridine, *Dalton Trans.*, 2019, **48**, 12407-12420
3. Y. Liu, K. Ai, X. Cheng, L. Huo and L. Lu, Gold-nanoclusterbased fluorescent sensors for highly sensitive and selective detection of cyanide in water, *Adv. Funct. Mater.*, 2010, **20**, 951–956
4. F.A. M. Al-Zahrani, R.M. El-Shishtawy, A.M. Asiri, A.M. Al-Soliemy, K.A. Mellah, N.S. E. Ahmed and A. Jedid, A new phenothiazine-based selective visual and fluorescent sensor for cyanide, *BMC Chemistry*, 2020, **14**, 2.
5. P. Jayasudha, R. Manivannan, S. Ciattini, L. Chelazzi and K. P. Elango, Selective sensing of cyanide in aqueous solution by quinone-indole ensembles – quantitative effect of substituents on the HBD property of the receptor moiety, *Sens. Actuators B*, 2017, **242**, 736–745.
